# Supplementary material
Source: PubMed Central journal article supplement (PMC2660598)
Supplement: NIHMS64779-supplement-01.pdf [file NIHMS64779-supplement-01.pdf]

## The Hecpudin-Binding Site on Ferroportin Is Evolutionarily Conserved

Ivana De Domenico, Elizabeta Nemeth, Jenifer M. Nelson, John D. Phillips, Richard S. Ajioka, Michael S. Kay, James P. Kushner, Tomas Ganz, Diane M. Ward, and Jerry Kaplan

### Supplemental Figures

**A**

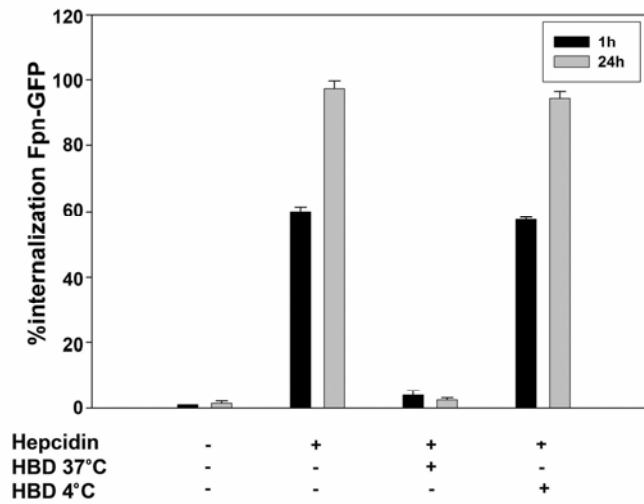

**B**

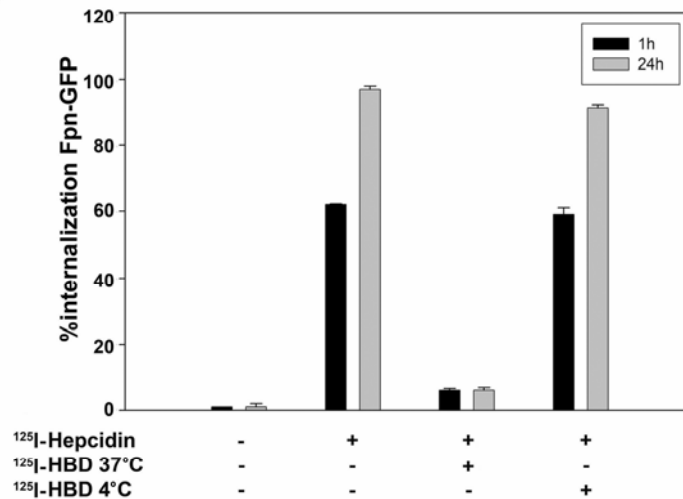

**Figure S1. Temperature dependent removal of internalization activity of hepcidin by the I-HBD.**

**A.** HEK293TFpn-GFP cells were incubated with hepcidin, hepcidin preincubated with HBD at 37°C or hepcidin preincubated with HBD at 4°C. Fpn-GFP internalization at one (**black bars**) and 24 (**grey bars**) hrs was quantified. **B.** <sup>125</sup>I-hepcidin was preincubated with HBD at 37°C or 4°C for one hr and then the mixture added to cells for one hr (**black bars**) or 24 hrs (**grey bars**). In the far right panel samples that had been incubated at 37°C were then shifted to 4°C for four hrs. The samples were then added to HEK293TFpn-GFP cells and the internalization of Fpn-GFP was determined.

**A**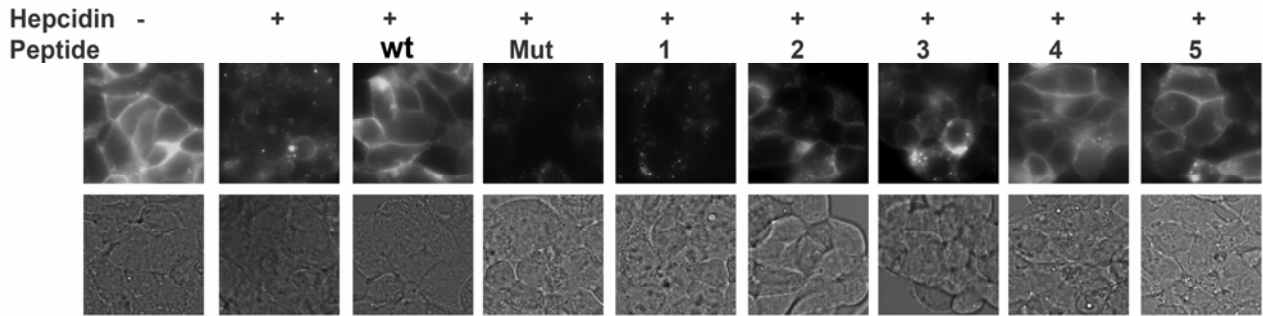**B**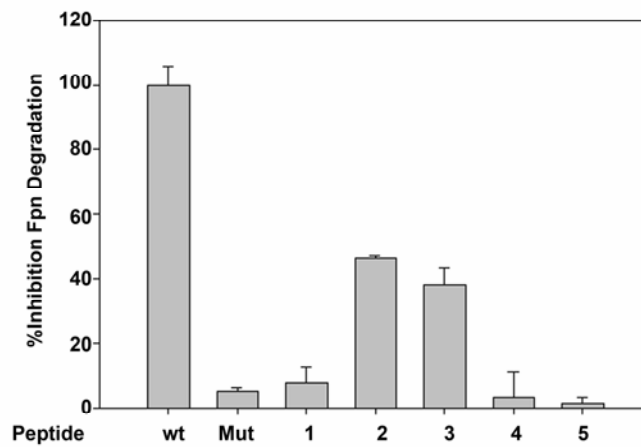

**Figure S2. Amino acid substitutions in the HBD affect hepcidin-mediated Fpn-GFP internalization.**

**A.** HEK293TFpn-GFP cells were incubated with or without hepcidin (1  $\mu\text{g}/\text{ml}$ ) or with hepcidin that had been pre-incubated either with wild type (Wt) or mutant (Mut) HBD. The HBDs and hepcidin were mixed at an equimolar ratio for two hrs at 37°C and then added to cells for one hr. Fpn internalization at one hr was analyzed by epifluorescence. **B.** The data were quantified by counting 10 fields containing 20-30 cells/field and the number of cells with cell surface fluorescence was determined.
